# Supplementary material for: Optimization of Canolol Production from Canola Meal Using Microwave Digestion as a Pre-Treatment Method
Source: MDPI journal article supplement (doi:10.3390/foods12020318), 2023-01-09
Supplement: s1 [file s1]

## Supplementary Data

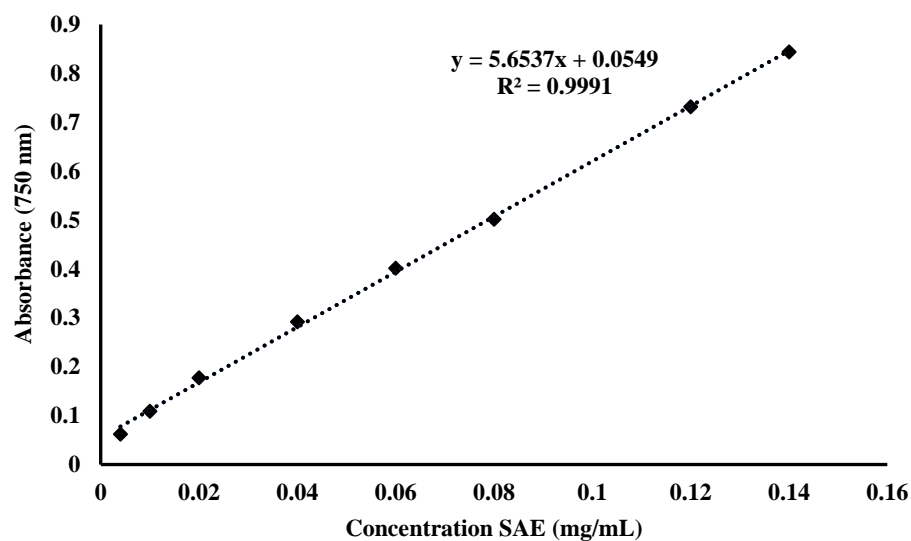

A

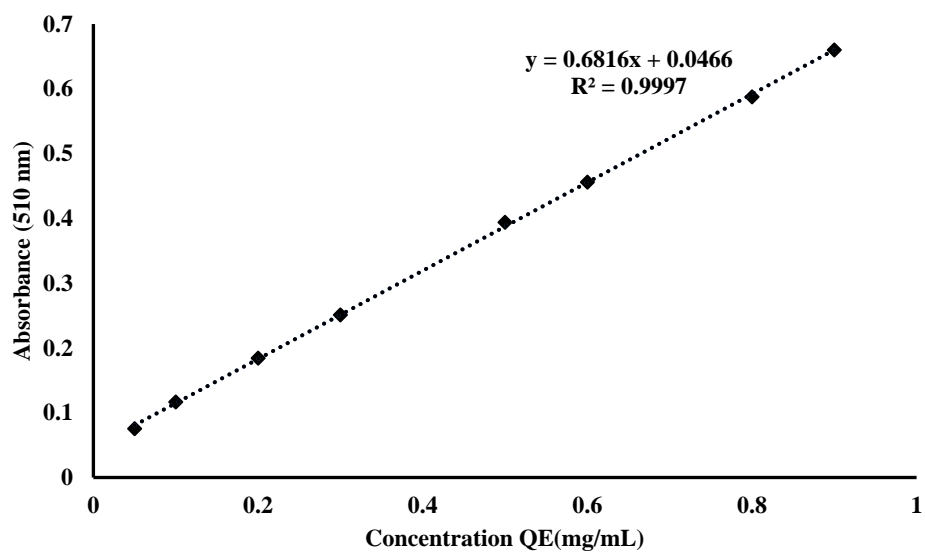

B

**Figure S1.** (A) Total Phenolic Content Standard Curve using Sinapic Acid Solution (1mM) as Standard (SAE - sinapic acid equivalents, mg - miligram, mL - mililiter, nm – nanometer,  $R^2$  - coefficient of variance); (B) Total Flavonoid Content Standard Curve

using Quercetin solution (1mM) as Standard (QE - quercetin equivalents, nm - nanometer, mg - miligram, mL - mililiter,  $R^2$  - coefficient of variance).

## Supplementary Data

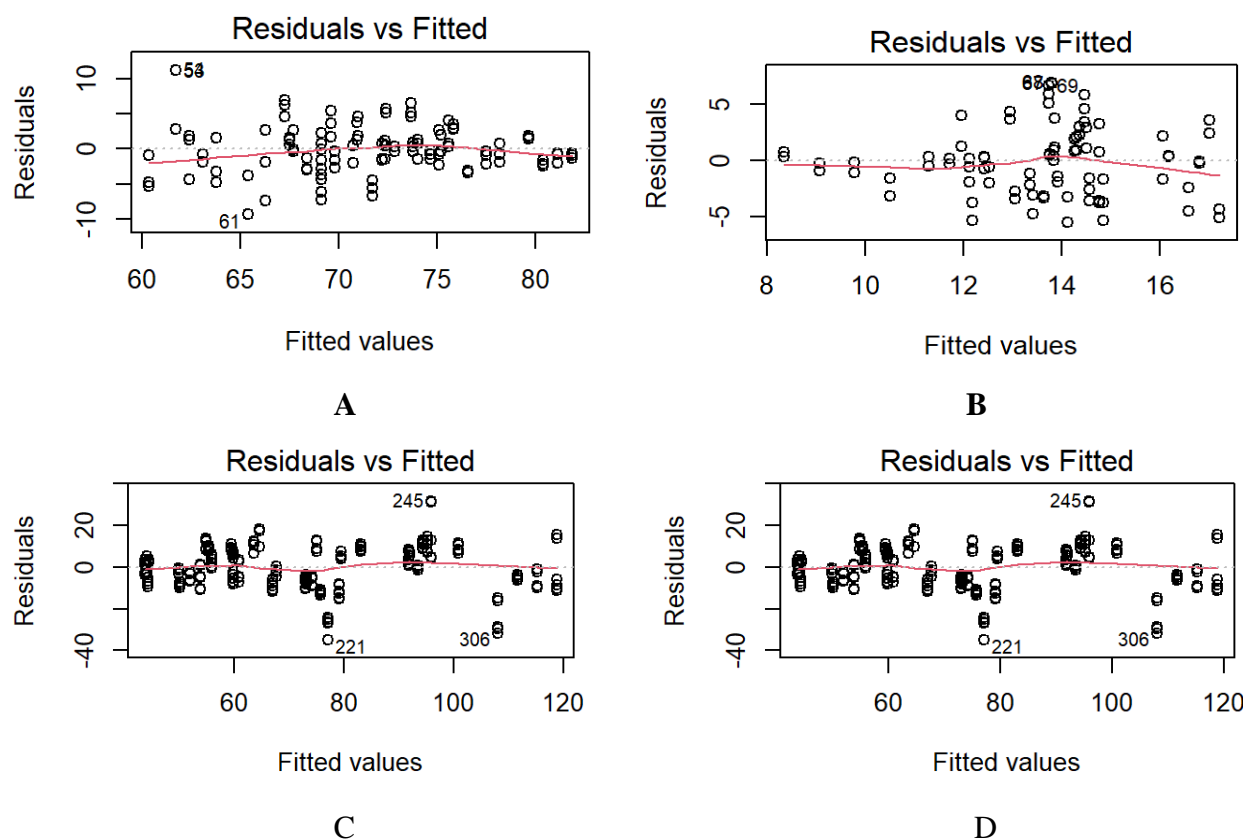

**Figure S2.** Residual Plots for Antioxidant activity (Residuals Vs Fitted Plots) **A** - DPPH activity, **B** - Metal Ion Chelation activity, **C** - Total phenolic content (TPC), **D** - Total flavonoids content (TFC)

## Supplementary Data

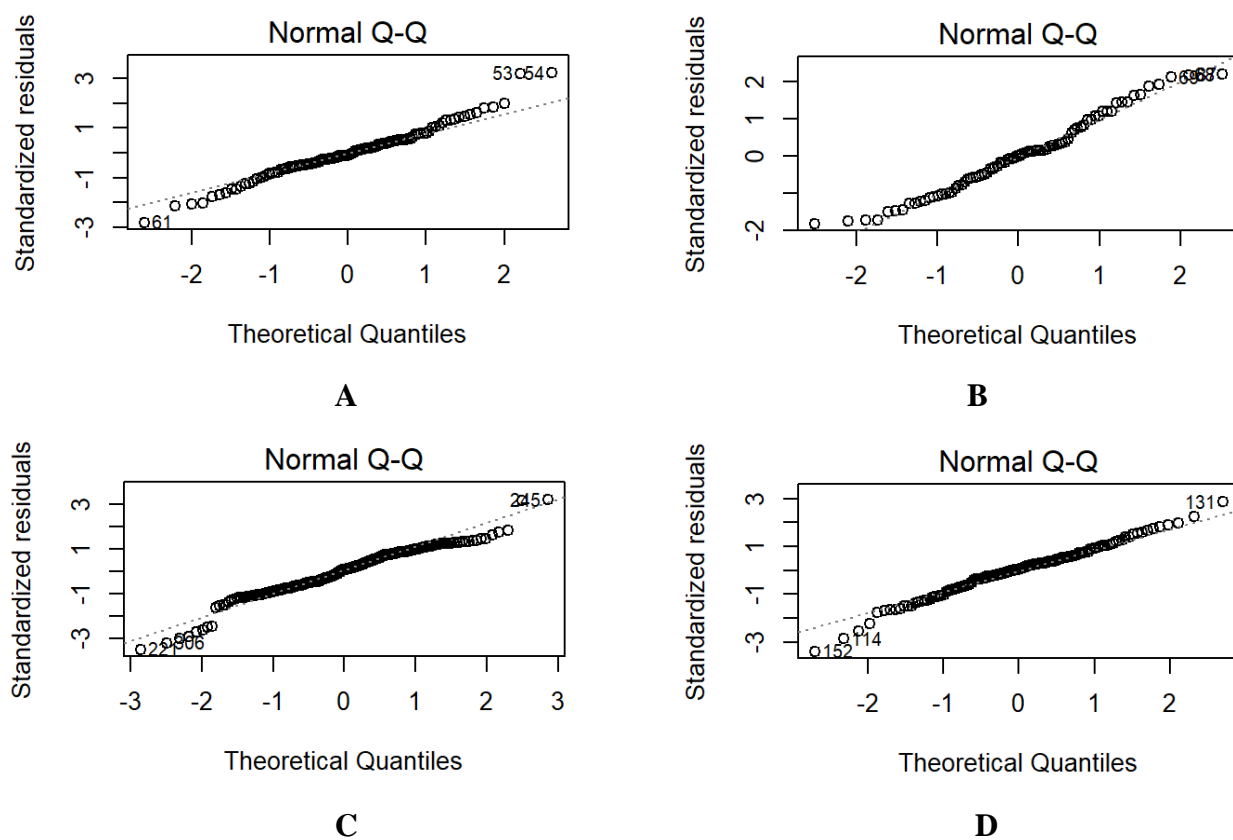

**Figure S3.** Normal Probability Plots for Antioxidant activity A - DPPH activity, B - Metal Ion Chelation activity, C - Total phenolic content (TPC), D - Total flavonoids content (TFC)
